# Supplementary material for: The Different Composition of Coumarins and Antibacterial Activity of Phlojodicarpus sibiricus and Phlojodicarpus villosus Root Extracts
Source: MDPI journal article supplement (doi:10.3390/plants13050601), 2024-02-22
Supplement: s1 [file s1]

**Table S1.** The functional group structures.

| $C_2H_3O_2$                                                                       | $C_4H_7O_2$                                                                       | $C_5H_7O_2$                                                                         | $C_5H_9O_2$                                                                         |
|-----------------------------------------------------------------------------------|-----------------------------------------------------------------------------------|-------------------------------------------------------------------------------------|-------------------------------------------------------------------------------------|
| 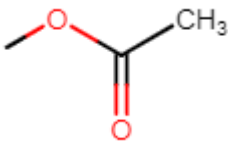 |  |   |  |
| acetyloxy                                                                         | isobutyryloxy<br>(isobutyroxyloxy)                                                | seneciodyloxy                                                                       | isovaleryloxy<br>(isovaleroxyloxy)                                                  |
|                                                                                   |  |   |  |
|                                                                                   | butoxy                                                                            | angeloyloxy                                                                         | 2-methylbutyryloxy                                                                  |
|                                                                                   |                                                                                   |  |                                                                                     |
|                                                                                   |                                                                                   | tigloyloxy                                                                          |                                                                                     |
